# Supplementary material for: Polymorphisms in lncRNA MIR2052HG and susceptibility to breast cancer in Chinese population
Source: publisher site journal article supplement (doi:10.18632/aging.203686), 2021-11-11
Supplement: Supplementary file [file aging-v13i21-203686-supplementary-material-SD1.pdf]

SUPPLEMENTARY FIGURE

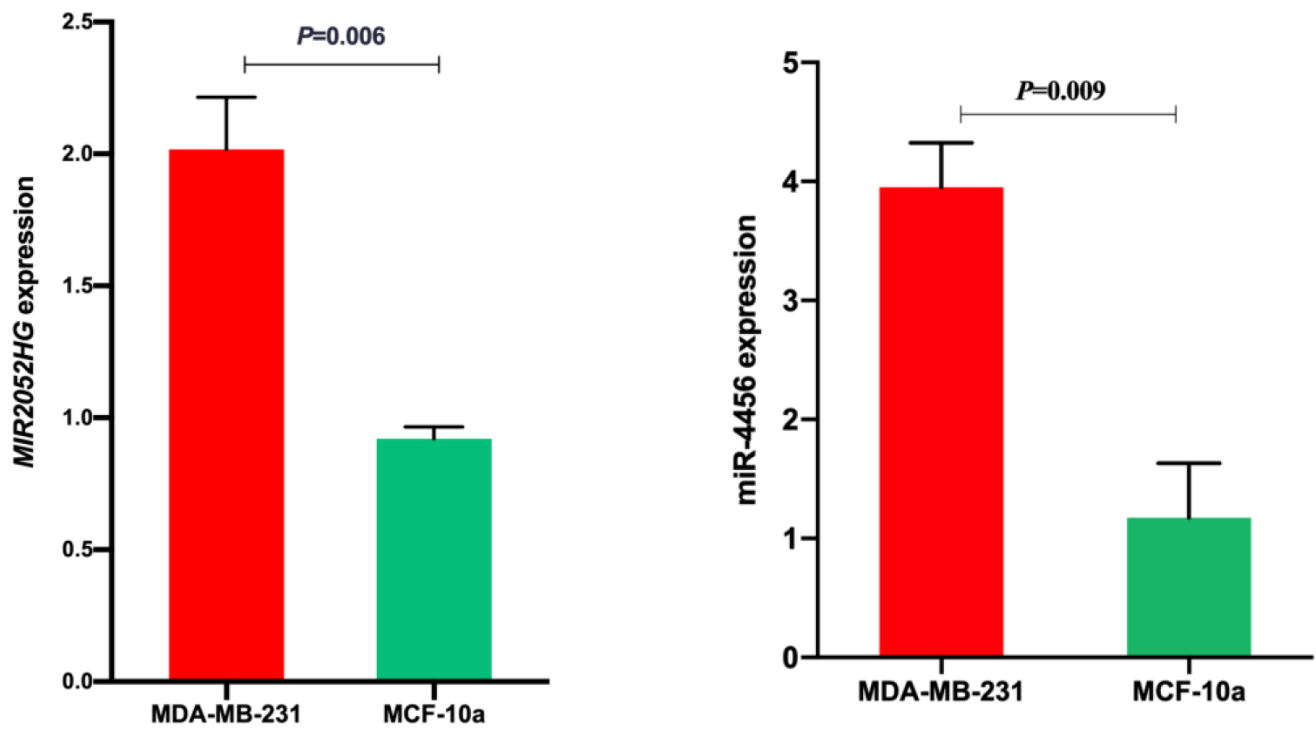

Supplementary Figure 1. Relative expression of *MIR2052HG* and miR-4456 in MDA-MB-231 and MCF-10A cells.
